# Supplementary material
Source: Research Square preprint supplement (doi:10.21203/rs.3.rs-9362710/v1)
Supplement: Supplementary file 1 [file 18de63145b5264201a5bcc4a.docx]

## **Supplemental material**

## **1. Search Strategy**

**MEDLINE (via PubMed) Search String:**

(("Ulcerative Colitis" OR "Colitis, Ulcerative" OR "Acute Severe Ulcerative Colitis" OR "ASUC" OR "Fulminant Colitis" OR "Steroid-Refractory" OR "Corticosteroid-Resistant" OR "Steroid-Dependent") AND ("Infliximab" OR "Cyclosporine" OR "Tacrolimus" OR "Calcineurin Inhibitors" OR "Tofacitinib" OR "Upadacitinib" OR "Ustekinumab" OR "Vedolizumab" OR "Rescue Therapy" OR "Salvage Therapy" OR "Sequential Therapy" OR "Accelerated Dosing" OR "Intensified Dosing") AND ("Systematic Review" OR "Meta-Analysis" OR "Network Meta-Analysis"))

**EMBASE (via Ovid) Search String:**

('ulcerative colitis'/exp OR 'ulcerative colitis' OR 'acute severe ulcerative colitis':ti,ab OR 'asuc':ti,ab OR 'fulminant colitis':ti,ab OR 'steroid refractory':ti,ab OR 'corticosteroid resistant':ti,ab OR 'steroid dependent':ti,ab) AND ('infliximab'/exp OR 'infliximab' OR 'cyclosporine'/exp OR 'cyclosporine' OR 'ciclosporin' OR 'tacrolimus'/exp OR 'tacrolimus' OR 'calcineurin inhibitor'/exp OR 'calcineurin inhibitor' OR 'tofacitinib'/exp OR 'tofacitinib' OR 'upadacitinib' OR 'ustekinumab' OR 'vedolizumab' OR 'rescue therapy':ti,ab OR 'salvage therapy':ti,ab OR 'sequential therapy':ti,ab OR 'accelerated dosing':ti,ab OR 'intensified dosing':ti,ab) AND ('systematic review'/exp OR 'meta analysis'/exp OR 'network meta analysis')

**Cochrane Library Search String:**

## ("ulcerative colitis":ti,ab OR "acute severe ulcerative colitis":ti,ab OR "ASUC":ti,ab OR "fulminant colitis":ti,ab OR "steroid-refractory":ti,ab OR "corticosteroid-resistant":ti,ab) AND ("infliximab":ti,ab OR "cyclosporine":ti,ab OR "tofacitinib":ti,ab OR "rescue therapy":ti,ab OR "salvage therapy":ti,ab) AND ("systematic review":ti,ab OR "meta-analysis":ti,ab)

**2. Corrected Covered Area**

**Table 1: Corrected Covered Area table**

|  | Huang 2024 | Choy 2019 | Jangra 2025 | Chang 2013 | Narula (Sequential) 2015 | Al Hayek 2025 | Narula 2016 | Szemes 2020 | Sebastian 2019 | Nalagatla 2019 | Zhao 2021 |
| --- | --- | --- | --- | --- | --- | --- | --- | --- | --- | --- | --- |
| Included studies |  |  |  |  |  |  |  |  |  |  |  |
| Al Khoury 2017 |  | 1 |  |  |  |  |  |  | 1 | 1 |  |
| An 2017 |  | 1 |  |  |  |  |  |  | 1 | 1 |  |
| Aratari 2008 |  | 1 |  |  |  |  |  |  |  |  |  |
| Beswick 2016 |  | 1 |  |  |  |  |  |  |  |  |  |
| Bressler 2008 |  | 1 |  |  |  |  |  |  |  |  |  |
| Chao 2019 | 1 |  |  |  |  | 1 |  |  |  |  |  |
| Chaparro 2012 |  |  |  |  | 1 | 1 |  |  |  |  |  |
| Choy 2018 | 1 |  |  |  |  | 1 |  |  | 1 | 1 |  |
| Croft 2013 | 1 | 1 |  |  |  | 1 | 1 | 1 |  |  | 1 |
| Daperno 2004 |  |  |  | 1 |  |  | 1 | 1 |  |  | 1 |
| Dean 2011 | 1 | 1 |  | 1 |  | 1 | 1 | 1 |  |  | 1 |
| Duijvis 2016 |  | 1 |  |  |  |  |  | 1 |  |  | 1 |
| Endo 2016 | 1 |  | 1 |  |  |  |  |  |  |  | 1 |
| Fehily 2020 |  |  | 1 |  |  |  |  |  |  |  |  |
| Fellermann 1998 |  |  | 1 |  |  |  |  |  |  |  |  |
| Fellermann 2002 |  |  | 1 |  |  |  |  |  |  |  |  |
| Fernandes 2016 |  | 1 |  |  |  |  |  |  |  |  |  |
| Florhomen 2011 |  | 1 |  |  |  |  |  |  |  |  |  |
| Garcia 2024 | 1 |  |  |  |  | 1 |  |  |  |  |  |
| Gibson 2015 | 1 | 1 |  |  |  | 1 |  |  | 1 | 1 |  |
| Gibson 2018 |  | 1 |  |  |  |  |  |  | 1 |  |  |
| Govani 2016 |  | 1 |  |  |  |  | 1 |  | 1 | 1 |  |
| Grazie 2021 | 1 |  |  |  |  |  |  |  |  |  |  |
| Jarnerot 2005 | 1 | 1 |  |  |  |  |  |  |  |  |  |
| Halpin 2013 |  | 1 |  |  |  |  |  |  |  |  |  |
| Herrlinger 2010 |  |  |  |  | 1 |  |  |  |  |  |  |
| Hoffman 2019 |  |  | 1 |  |  |  |  |  |  |  |  |
| Hogebauer 2003 |  |  | 1 |  |  |  |  |  |  |  |  |
| Hulkower 2016 |  | 1 |  |  |  |  |  |  |  |  |  |
| Inaba |  |  |  |  |  |  |  |  |  |  | 1 |
| Jaeger 2019 |  |  | 1 |  |  |  |  |  |  |  |  |
| Kaser 2001 |  | 1 |  |  |  |  |  |  |  |  |  |
| Kawakami 2015 |  |  | 1 |  |  |  |  |  |  |  |  |
| Kim 2015 | 1 | 1 |  |  |  | 1 | 1 | 1 |  |  | 1 |
| Kitayama 2020 |  |  | 1 |  |  |  |  |  |  |  | 1 |
| Kohn 2007 |  | 1 |  |  |  |  |  |  |  |  |  |
| Laharie 2012/15 | 1 | 1 |  |  |  | 1 | 1 |  |  |  | 1 |
| Laharie 2017 |  | 1 |  |  |  |  |  | 1 |  |  |  |
| Lawranece 2017 |  |  | 1 |  |  |  |  |  |  |  |  |
| Landy 2013 |  |  | 1 |  |  |  |  |  |  |  |  |
| Leblanc 2011 |  |  |  | 1 | 1 |  |  |  |  |  |  |
| Lees 2007 |  | 1 |  |  |  |  |  |  |  |  |  |
| Lichtiger 1994 | 1 |  |  |  |  |  |  |  |  |  |  |
| Liu |  |  |  |  |  | 1 |  |  |  |  |  |
| Llao 2016 |  | 1 |  |  |  |  |  |  |  |  |  |
| Lowenberg 2014 |  | 1 |  |  |  |  |  |  |  |  |  |
| Lynch 2013 |  |  |  |  |  |  | 1 |  |  |  | 1 |
| Maser 2008 |  |  |  | 1 | 1 |  |  |  |  |  |  |
| Manosa 2009 |  |  |  |  | 1 |  |  |  |  |  |  |
| Mastumoto 2017 |  |  | 1 |  |  |  |  |  |  |  | 1 |
| Minami 2014 |  |  |  |  | 1 |  |  |  |  |  |  |
| Mocciaro 2012 | 1 | 1 |  | 1 |  | 1 | 1 | 1 |  |  | 1 |
| Monterubbianesi 2014 |  | 1 |  |  |  |  |  |  |  |  |  |
| Mortensen 2011 |  | 1 |  |  |  |  |  |  |  |  |  |
| Nalagatla 2018 |  | 1 |  |  |  | 1 |  |  | 1 | 1 |  |
| Naves 2014 | 1 |  |  |  |  |  | 1 | 1 |  |  | 1 |
| Nelson 2014 |  |  |  |  |  |  | 1 |  |  |  |  |
| Ogata 2012 | 1 |  | 1 |  |  |  |  |  |  |  |  |
| Olumedo Martin 2017 |  |  | 1 |  |  |  |  |  |  |  |  |
| Ordas 2017 | 1 | 1 |  |  | 1 | 1 |  | 1 |  |  | 1 |
| Protic 2013 |  |  |  |  |  |  | 1 | 1 |  |  | 1 |
| Raojcic 2014 |  |  |  |  |  |  | 1 | 1 |  |  |  |
| Regueiro 2006 |  | 1 |  |  |  |  |  |  |  |  |  |
| Ribaldone 2017 |  | 1 |  |  |  |  |  |  |  |  |  |
| Saifuddin Harris 2018 |  |  | 1 |  |  |  |  |  |  |  |  |
| Sands 2001 | 1 | 1 |  |  |  |  |  |  |  |  |  |
| Sciemeca 2012 |  |  |  |  |  |  | 1 | 1 |  |  |  |
| Seah 2017 |  | 1 |  |  |  |  |  |  |  |  |  |
| Sebastian |  |  |  |  |  | 1 |  |  |  |  |  |
| Schmidt 2013 |  |  | 1 |  |  |  |  |  |  |  |  |
| Singh |  |  |  |  |  |  |  |  | 1 |  |  |
| Shah 2018 |  | 1 |  |  |  |  |  |  | 1 | 1 |  |
| Shepherd 2014 |  | 1 |  |  |  |  |  |  |  |  |  |
| Sjoberg 2013 |  | 1 |  | 1 |  |  | 1 | 1 |  |  | 1 |
| Sly 2017 |  | 1 |  |  |  |  |  |  | 1 |  |  |
| Song 2021 | 1 |  |  |  |  | 1 |  | 1 |  |  |  |
| Sood 2014 |  | 1 |  |  |  |  |  |  |  |  |  |
| Syal 2021 | 1 |  |  |  |  | 1 |  |  |  |  |  |
| Takeuchi 2013 |  |  |  |  | 1 |  |  |  |  |  |  |
| Tsukamoto 2013 |  |  |  |  | 1 |  |  |  |  |  |  |
| Van Langenberg 2015 |  | 1 |  |  |  |  |  |  |  |  |  |
| Williams 2016 | 1 | 1 |  |  |  | 1 | 1 | 1 |  |  | 1 |
| Yamamoto-Furusho 2008 | 1 | 1 | 1 |  | 1 |  |  |  |  |  |  |
| Yoshimura 2013 |  |  |  |  |  |  | 1 |  |  |  |  |
